# Supplementary material for: Changes in the Endophytic Bacterial Community of Brassica rapa after Application of Systemic Insecticides
Source: MDPI journal article supplement (doi:10.3390/ijms242015306), 2023-10-18
Supplement: s1 [file s1]

# Changes in the endophytic bacterial community of *Brassica rapa* after application of systemic insecticides

Md. Tareq Bin Salam, Ryota Kataoka

## Supplementary data:

| 2nd week       | 4th week       |                                 |                |
|----------------|----------------|---------------------------------|----------------|
| N1R1 N1R2 N1R3 | N1R1 N1R2 N1R3 | N1= Single dose of imidocloprid | Experiment - 1 |
| N2R1 N2R2 N2R3 | N2R1 N2R2 N2R3 | N2= Single dose of acetamiprid  |                |
| N3R1 N3R2 N3R3 | N3R1 N3R2 N3R3 | N3= Single dose of acephate     |                |
| N4R1 N4R2 N4R3 | N4R1 N4R2 N4R3 | N4= Single dose of dinotefuran  |                |
| C1R1 C1R2 C1R3 | C1R1 C1R2 C1R3 | C= No insecticide               |                |
| 2nd week       | 4th week       |                                 |                |
| T1R1 T1R2 T1R3 | T1R1 T1R2 T1R3 | T1= Single dose of dinotefuran  | Experiment - 2 |
| T2R1 T2R2 T2R3 | T2R1 T2R2 T2R3 | T2= Double doses of dinotefuran |                |
| T3R1 T3R2 T3R3 | T3R1 T3R2 T3R3 | T3= Triple doses of dinotefuran |                |
| C2R1 C2R2 C2R3 | C2R1 C2R2 C2R3 | C= No dinotefuran               |                |

Figure S1: Layout of the experiment

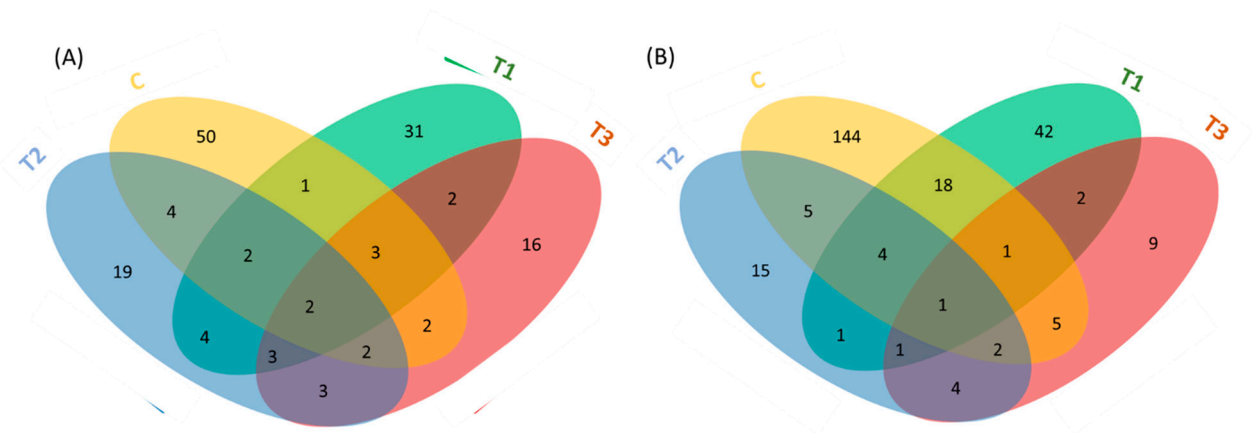

Figure S2: Venn- diagram represents the non-culturable bacterial richness along with bacterial similarities and differences among treatments at (A) 2<sup>nd</sup> week, (B) 4<sup>th</sup> week. Here, C, no dinotefuran application; T1, single dose of dinotefuran application; T2, double dose of dinotefuran application; and T3, triple dose of dinotefuran application.

**Table S1:** Frequency of culturable endophytic bacterial isolates, their nearest genera (>97% similarities) and their accession number from different treatments of systemic insecticides along with control

| Treatment | Week                 | Type | Name of Bacterium                      | Relative frequency | Accession no. |
|-----------|----------------------|------|----------------------------------------|--------------------|---------------|
| Control   | 2 <sup>nd</sup> week | 1    | <i>Brucella sp.</i>                    | 15%                | LC773881      |
|           |                      | 2    | <i>Rhodococcus sp.</i>                 | 15%                | LC773882      |
|           |                      | 3    | <i>Bacillus thuringiensis</i>          | 35%                | LC773883      |
|           |                      | 4    | <i>Curtobacterium sp.</i>              | 5%                 | LC773884      |
|           |                      | 5    | <i>Burkholderia cenocepacia</i>        | 5%                 | LC773885      |
|           |                      | 6    | <i>Methylobacterium sp.</i>            | 5%                 | LC773886      |
|           |                      | 7    | <i>Paenarthrobacter nicotinovorans</i> | 10%                | LC773887      |
|           |                      | 8    | <i>Microbacterium sp</i>               | 5%                 | LC773888      |
|           |                      | 9    | <i>Bacillus subtilis</i>               | 5%                 | LC773889      |
|           | 4 <sup>th</sup> week | 1    | <i>Ralstonia sp.</i>                   | 16%                | LC773908      |
|           |                      | 2    | <i>Burkholderia cenocepacia</i>        | 19%                | LC773909      |
|           |                      | 3    | <i>Bacillus thuringiensis</i>          | 6%                 | LC773910      |
|           |                      | 4    | <i>Comamonadaceae bacterium</i>        | 3%                 | LC773911      |
|           |                      | 5    | <i>Herbaspirillum chlorophenolicum</i> | 3%                 | LC773912      |
|           |                      | 6    | <i>Pseudomonas alcaligenes</i>         | 9%                 | LC773913      |
|           |                      | 7    | <i>Sphingobium yanoikuyae</i>          | 3%                 | LC773914      |
|           |                      | 8    | <i>Sphingomonas yantingensis</i>       | 6%                 | LC773915      |
|           |                      | 9    | <i>Microbacterium sp</i>               | 6%                 | LC773916      |

|    |                      |    |                                        |     |          |
|----|----------------------|----|----------------------------------------|-----|----------|
|    |                      | 10 | <i>Staphylococcus epidermidis</i>      | 6%  | LC773917 |
|    |                      | 11 | <i>Ralstonia sp.</i>                   | 6%  | LC773918 |
|    |                      | 12 | <i>Sphingomonas koreensis</i>          | 6%  | LC773919 |
|    |                      | 13 | <i>Mitsuaria sp.</i>                   | 6%  | LC773920 |
|    |                      | 14 | <i>Agrobacterium tumefaciens</i>       | 3%  | LC773921 |
| N1 | 2 <sup>nd</sup> week | 1  | <i>Rhodococcus kroppenstedtii</i>      | 29% | LC773890 |
|    |                      | 2  | <i>Bacillus sp. (in: firmicutes)</i>   | 29% | LC773891 |
|    |                      | 3  | <i>Brucella pseudogrignonensis</i>     | 14% | LC773892 |
|    |                      | 4  | <i>Nocardioides sp.</i>                | 14% | LC773893 |
|    |                      | 5  | <i>Burkholderia cenocepacia</i>        | 14% | LC773894 |
|    | 4 <sup>th</sup> week | 1  | <i>Pseudomonas sp.</i>                 | 25% | LC773922 |
|    |                      | 2  | <i>Microbacterium sp.</i>              | 21% | LC773923 |
|    |                      | 3  | <i>Agrobacterium pusense</i>           | 8%  | LC773924 |
|    |                      | 4  | <i>Microbacterium paraoxydans</i>      | 8%  | LC773925 |
|    |                      | 5  | <i>Paenarthrobacter nicotinovorans</i> | 21% | LC773926 |
|    |                      | 6  | <i>Variovorax sp.</i>                  | 8%  | LC773927 |
|    |                      | 7  | <i>Duganella lactea</i>                | 8%  | LC773928 |
| N2 | 2 <sup>nd</sup> week | 1  | <i>Curtobacterium sp.</i>              | 6%  | LC773895 |
|    |                      | 2  | <i>Brucella sp.</i>                    | 31% | LC773896 |
|    |                      | 3  | <i>Stenotrophomonas maltophilia</i>    | 13% | LC773897 |

|    |                      |    |                                          |     |          |
|----|----------------------|----|------------------------------------------|-----|----------|
| N3 | 4 <sup>th</sup> week | 4  | <i>Bacillus thuringiensis</i>            | 13% | LC773898 |
|    |                      | 5  | <i>Nocardioides sp.</i>                  | 19% | LC773899 |
|    |                      | 6  | <i>Brucella pseudogrignonensis</i>       | 6%  | LC773900 |
|    |                      | 7  | <i>Microbacterium sp</i>                 | 13% | LC773901 |
|    |                      | 1  | <i>Labrys sp. (in: a-proteobacteria)</i> | 25% | LC773929 |
|    |                      | 2  | <i>Sphingomonas sp.</i>                  | 8%  | LC773930 |
|    |                      | 3  | <i>Stenotrophomonas maltophilia</i>      | 21% | LC773931 |
|    |                      | 4  | <i>Agrobacterium pusense</i>             | 4%  | LC773932 |
|    |                      | 5  | <i>Sphingobium yanoikuyae</i>            | 8%  | LC773933 |
|    |                      | 6  | <i>Mitsuaria chitosanitabida</i>         | 8%  | LC773934 |
|    |                      | 7  | <i>Bacillus subtilis</i>                 | 4%  | LC773935 |
| N3 | 2 <sup>nd</sup> week | 8  | <i>Gottfriedia acidiceris</i>            | 8%  | LC773936 |
|    |                      | 9  | <i>Microbacterium sp.</i>                | 4%  | LC773937 |
|    |                      | 10 | <i>Niabella yanshanensis</i>             | 4%  | LC773938 |
|    |                      | 11 | <i>Streptomyces griseorubiginosus</i>    | 4%  | LC773939 |
|    |                      | 1  | <i>Paenarthrobacter nicotinovorans</i>   | 38% | LC773902 |
| N3 | 2 <sup>nd</sup> week | 2  | <i>Burkholderia cenocepacia</i>          | 19% | LC773903 |
|    |                      | 3  | <i>Curtobacterium sp.</i>                | 19% | LC773904 |
|    |                      | 4  | <i>Bacillus thuringiensis</i>            | 6%  | LC773905 |
| N3 | 2 <sup>nd</sup> week | 5  | <i>Ochrobactrum teleogrylli</i>          | 13% | LC773906 |

|    |                      |   |                                     |     |          |
|----|----------------------|---|-------------------------------------|-----|----------|
| N4 | 4 <sup>th</sup> week | 6 | <i>Brucella pseudogrignonensis</i>  | 6%  | LC773907 |
|    |                      | 1 | <i>Pseudomonas sp.</i>              | 50% | LC773940 |
|    |                      | 2 | <i>Ensifer adhaerens</i>            | 31% | LC773941 |
|    |                      | 3 | <i>Microbacterium sp.</i>           | 13% | LC773942 |
|    |                      | 4 | <i>Bacillus subtilis</i>            | 6%  | LC773943 |
|    | 2 <sup>nd</sup> week | 1 | <i>Bacillus proteolyticus</i>       | 36% | LC773453 |
|    |                      | 2 | <i>Ectobacillus panaciterrae</i>    | 7%  | LC773454 |
|    |                      | 3 | <i>Priestia aryabhattai</i>         | 14% | LC773455 |
|    |                      | 4 | <i>Sphingomonas sp.</i>             | 14% | LC773456 |
|    |                      | 5 | <i>Pseudomonas koreensis</i>        | 7%  | LC773457 |
|    |                      | 6 | <i>Paenibacillus glycanilyticus</i> | 7%  | LC773458 |
|    |                      | 7 | <i>Paenibacillus sp.</i>            | 14% | LC773459 |
|    | 4 <sup>th</sup> week | 1 | <i>Bacillus subtilis</i>            | 33% | LC773460 |
|    |                      | 2 | <i>Asticcacaulis taihuensis</i>     | 28% | LC773461 |
|    |                      | 3 | <i>Pseudoxanthomonas sp.</i>        | 17% | LC773462 |
|    |                      | 4 | <i>Priestia aryabhattai</i>         | 11% | LC773463 |
|    |                      | 5 | <i>Stenotrophomonas maltophilia</i> | 6%  | LC773464 |
|    |                      | 6 | <i>Paenibacillus glycanilyticus</i> | 6%  | LC773465 |

**Table S2:** Frequency of culturable endophytic bacterial isolates, their nearest genera (>97% similarities) and their accession number from different doses of dinotefuran treated plants along with control

| Treatment | Week                 | Type | Name of Bacterium                       | Relative frequency | Accession no. |
|-----------|----------------------|------|-----------------------------------------|--------------------|---------------|
| Control   | 2 <sup>nd</sup> week | 1    | <i>Priestia aryabhattai</i>             | 25%                | LC773429      |
|           |                      | 2    | <i>Bacillus velezensis</i>              | 8%                 | LC773430      |
|           |                      | 3    | <i>Paenibacillus sp.</i>                | 17%                | LC773431      |
|           |                      | 4    | <i>Bacillus tropicus</i>                | 8%                 | LC773432      |
|           |                      | 5    | <i>Paenibacillus pocheonensis</i>       | 8%                 | LC773433      |
|           |                      | 6    | <i>Paenibacillus glycanilyticus</i>     | 8%                 | LC773434      |
|           |                      | 7    | <i>Bacillus subtilis</i>                | 8%                 | LC773435      |
|           |                      | 8    | <i>Burkholderia cenocepacia</i>         | 8%                 | LC773436      |
|           |                      | 9    | <i>Bacillus cereus</i>                  | 8%                 | LC773437      |
|           | 4 <sup>th</sup> week | 1    | <i>Bacillus cereus</i>                  | 21%                | LC773438      |
|           |                      | 2    | <i>Paenibacillus sp.</i>                | 15%                | LC773439      |
|           |                      | 3    | <i>Paenibacillus cineris</i>            | 9%                 | LC773440      |
|           |                      | 4    | <i>Paenibacillus favisporus</i>         | 6%                 | LC773441      |
|           |                      | 5    | <i>Neobacillus drementensis</i>         | 6%                 | LC773442      |
|           |                      | 6    | <i>Paenibacillus glycanilyticus</i>     | 6%                 | LC773443      |
|           |                      | 7    | <i>Bosea sp. (in: a-proteobacteria)</i> | 3%                 | LC773444      |
|           |                      | 8    | <i>Priestia aryabhattai</i>             | 6%                 | LC773445      |
|           |                      | 9    | <i>Lysinibacillus xylanilyticus</i>     | 6%                 | LC773446      |
|           |                      | 10   | <i>Bacillus thuringiensis</i>           | 6%                 | LC773447      |
|           |                      | 11   | <i>Bacillus cereus</i>                  | 3%                 | LC773448      |

|    |                      |    |                                     |     |          |
|----|----------------------|----|-------------------------------------|-----|----------|
| T1 |                      | 12 | <i>Bacillus sp.</i>                 | 6%  | LC773449 |
|    |                      | 13 | <i>Burkholderia cenocepacia</i>     | 3%  | LC773450 |
|    |                      | 14 | <i>Bacillus subtilis</i>            | 3%  | LC773451 |
|    |                      | 15 | <i>Paenibacillus rigui</i>          | 3%  | LC773452 |
|    | 2 <sup>nd</sup> week | 1  | <i>Bacillus proteolyticus</i>       | 36% | LC773453 |
|    |                      | 2  | <i>Ectobacillus panaciterrae</i>    | 7%  | LC773454 |
|    |                      | 3  | <i>Priestia aryabhattai</i>         | 14% | LC773455 |
|    |                      | 4  | <i>Sphingomonas sp.</i>             | 14% | LC773456 |
|    |                      | 5  | <i>Pseudomonas koreensis</i>        | 7%  | LC773457 |
|    |                      | 6  | <i>Paenibacillus glycanilyticus</i> | 7%  | LC773458 |
|    |                      | 7  | <i>Paenibacillus sp.</i>            | 14% | LC773459 |
|    | 4 <sup>th</sup> week | 1  | <i>Bacillus subtilis</i>            | 33% | LC773460 |
|    |                      | 2  | <i>Asticcacaulis taihuensis</i>     | 28% | LC773461 |
|    |                      | 3  | <i>Pseudoxanthomonas sp.</i>        | 17% | LC773462 |
|    |                      | 4  | <i>Priestia aryabhattai</i>         | 11% | LC773463 |
|    |                      | 5  | <i>Stenotrophomonas maltophilia</i> | 6%  | LC773464 |
|    |                      | 6  | <i>Paenibacillus glycanilyticus</i> | 6%  | LC773465 |
| T2 | 2 <sup>nd</sup> week | 1  | <i>Pseudomonas sp.</i>              | 27% | LC773466 |
|    |                      | 2  | <i>Paenibacillus sp.</i>            | 18% | LC773467 |
|    |                      | 3  | <i>Paenibacillus glycanilyticus</i> | 18% | LC773468 |
|    |                      | 4  | <i>Bacillus sp.</i>                 | 9%  | LC773469 |
|    |                      | 5  | <i>Bacillus subtilis</i>            | 9%  | LC773470 |
|    |                      | 6  | <i>Priestia megaterium</i>          | 18% | LC773471 |

|    |                      |   |                                           |     |          |
|----|----------------------|---|-------------------------------------------|-----|----------|
| T3 | 4 <sup>th</sup> week | 1 | <i>Priestia megaterium</i>                | 38% | LC773472 |
|    |                      | 2 | <i>Paenibacillus</i> sp.                  | 28% | LC773473 |
|    |                      | 3 | <i>Bacillus velezensis</i>                | 17% | LC773474 |
|    |                      | 4 | <i>Mesorhizobium</i> sp.                  | 10% | LC773475 |
|    |                      | 5 | <i>Sphingobium</i> sp.                    | 3%  | LC773476 |
|    |                      | 6 | <i>Priestia aryabhattai</i>               | 3%  | LC773477 |
|    | 2 <sup>nd</sup> week | 1 | <i>Margalitia shackletonii</i>            | 43% | LC773478 |
|    |                      | 2 | <i>Nocardioides aromaticivorans</i>       | 29% | LC773479 |
|    |                      | 3 | <i>Paenarthrobacter nitroguajacolicus</i> | 14% | LC773480 |
|    |                      | 4 | <i>Priestia aryabhattai</i>               | 7%  | LC773481 |
|    |                      | 5 | <i>Priestia megaterium</i>                | 7%  | LC773482 |
|    | 4 <sup>th</sup> week | 1 | <i>Pseudomonas koreensis</i>              | 50% | LC773483 |
|    |                      | 2 | <i>Priestia aryabhattai</i>               | 17% | LC773484 |
|    |                      | 3 | <i>Bacillus pseudomycoides</i>            | 17% | LC773485 |
|    |                      | 4 | <i>Bacillus thuringiensis</i>             | 17% | LC773486 |
